# Supplementary material
Source: Research Square preprint supplement (doi:10.21203/rs.3.rs-9081234/v1)
Supplement: Supplementary file 1 [file 05793b4b82b441ac9c5f7611.pdf]

## RESEARCH CONSENT FORM

**Title of the Study:** Decoding Implicatures: Cultivating Robust Linguistic Reasoning through Political Discourse in EFL Education

**Investigator:** Martina Mulyani, Iis Suryani Herdiah

**Introduction:**

You are invited to participate in a research study. Before you decide whether or not to participate, it is important for you to understand why the research is being done and what it will involve. Please take the time to read the following information carefully. Feel free to ask any questions you may have before making your decision.

**Purpose of the Study:** The purpose of this study is to explore implicature in political speech to develop students' linguistic reasoning

**Procedures:** If you agree to participate, you will be asked to identify the implicature in the speech and give the reason why you think that way.

**Risks and Benefits:** There are no anticipated risks associated with participation in this study. However, you may benefit from the knowledge gained through the research, and your participation will contribute in finding out the role of implicature in political speech to develop students' linguistic reasoning

**Confidentiality:** All information you provide will remain confidential and will only be used for research purposes. Your identity will not appear in any reports or publications.

**Voluntary Participation:** Participation in this study is entirely voluntary. You may refuse to participate or withdraw at any time without consequence. Your decision will not affect your current or future relations with the researchers or the sponsoring institution.

**Contact Information:** If you have any questions or concerns about the study, please contact:  
[WA: +6281221500735]

If you have questions about your rights as a research participant or wish to report a concern to someone independent of the research team, please contact:  
[STKIP PASUNDAN] [022) (6628311]

## List of Participants

**Consent:** I have read and understood the information provided above, and I voluntarily agree to participate in the study.

| No | Date       | Name                | Nim      | Signature                                                                             |
|----|------------|---------------------|----------|---------------------------------------------------------------------------------------|
| 1  | 18-11-2025 | Keisai Zahra        | 22510044 | 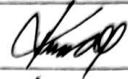   |
| 2  | 18-11-2025 | Aytha Kayla A.F     | 22510017 |    |
| 3  | 18-11-2025 | Fani Levia P        | 22510034 |    |
| 4  | 18-11-2025 | Balgis Clarissa     | 22510028 |    |
| 5  | 18-11-2025 | Ayu dian            | 22510015 |    |
| 6  | 18-11-2025 | Wanda               | 2151655  |    |
| 7  | 18-11-2025 | M. Arul .Husen .P   | 22510022 |    |
| 8  | 18-11-2025 | Adlin H. Siregar    | 22510031 |    |
| 9  | 18-11-2025 | Salva Ari Putri     | 22510052 |   |
| 10 | 18-11-2025 | Amanda Fier         | 22510053 |  |
| 11 | 18-11-2025 | Chandra Darmawan    | 22510016 |  |
| 12 | 18-11-2025 | Amelia Rahayu Putri | 22510019 |  |
| 13 | 23-11-2025 | M. PARIS H          | 22510028 |  |
| 14 | 25-11-2025 | Rahma Aulia         | 22510032 |  |
| 15 | 25-11-2025 | Aulia Maylani       | 22510033 |  |
| 16 | 25-11-2025 | Citra Litrawati     | 22510055 |  |
| 17 |            |                     |          |                                                                                       |
| 18 |            |                     |          |                                                                                       |
| 20 |            |                     |          |                                                                                       |
| 21 |            |                     |          |                                                                                       |
| 22 |            |                     |          |                                                                                       |
| 23 |            |                     |          |                                                                                       |
| 24 |            |                     |          |                                                                                       |
| 25 |            |                     |          |                                                                                       |
