# Supplementary material
Source: Research Square preprint supplement (doi:10.21203/rs.3.rs-9081234/v1)
Supplement: Supplementary file 2 [file a2fb0af70224ea6601976450.docx]

**Appendix 1 . The students' recognition of implied meaning**

| No | **Name** | **Bottom up** | **Expression** | **Interpretation** |
| --- | --- | --- | --- | --- |
| 1 | Amanda fires | - Circling the implicatures found in the speech - Putting the translations in margin - Identifying conventional and conversational implicature |  |  |
| 2 | Salva Asri | - Circling the implicatures found in the speech - Putting the translations in margin - Identifying conventional and conversational implicature |  |  |
| 3 | Keisha | - Circling, highlighting the implicatures, conjunction, and cohesive devices found in the speech - Putting the translations in margin - Identifying conventional and conversational implicature |  |  |
| 4 | Arul Husen | - Circling the implicatures found in the speech - Putting the translations in margin - Identifying conventional and conversational implicature |  |  |
| 5 | Ayu Dian | - Circling, highlighting the implicatures, conjunction, and cohesive devices found in the speech - Putting the translations in margin - Identifying conventional and conversational implicature |  |  |
| 6 | Adlin | - Circling some implicatures found in the speech - Putting the translations in margin - Identifying conventional and conversational implicature - Providing some interpretation of the targeted implicatures found in the first and second pages of the text | - We are of different race, religion and nationality, - but we gather as a human family. | - It implies that the world is devided   and the speech encourage unity |
|  |  |  | We are here first and especially as fellow human beings each created equal | - It implies that inquality still exist   The speaker stated that people struggled for equality |
|  |  |  | Our World is driven by conflict, injustice, and deepening uncertainty | Criticism of the country that created conflict but the speaker did not mention the name of the country |
|  |  | . | Currently, the disaster situation in Gaza is still spreading in front of our eyes. Currently, innocent people are crying for help, crying to be saved. Who will save them? Who will save innocent people? Who will save the elderly and women? | The speaker put emphasis on problem in Gaza. The repetition creates urgency and empathy |
| 7 | Wanda | - Highlighting the implicatures, conjunction, and cohesive devices found in the speech - Putting the translations in margin - Identifying conventional and conversational implicature |  |  |
| 8 | Shilvia Nuraini | - Highligting some implicatures found in the speech - Putting the translations in margin - Identifying conventional and conversational implicature - Providing some interpretation of the targeted implicatures found in the first and second pages of the text | - We are of different race, religion and nationality, - but we gather as a human family. | It talks about divided world |
|  |  |  | We are here first and especially as fellow human beings each created equal | Injustice still exists in the world |
|  | . |  | …We were treated lower than dogs in our own homeland. | Major countries are partly to blame for creating war, racism, and oppression |
|  |  |  | Our World is driven by conflict, injustice, and deepening uncertainty. Every day we witness suffering, genocide, and blatant neglect of international law and human propriety. | Criticism of the country that triggered the war without mentioning the name |
|  |  |  | The strong do what they can, the weak bear what they have to bear." We must reject this doctrine. The UN is here to reject this doctrine | The world is still ruled by unjust power |
|  |  |  | We choose to answer these challenges directly at home and help abroad whenever we can. | The country must cooperate one to another immediately otherwise the crisis may get worsen |
|  |  |  | Our children are paying attention. They learn leadership not from textbooks, but from our choices. | The world’s leader should set good example |
| 9 | Salma Putri | - Underlining, and marking some implicatures found in the speech - Putting the translations in margin - Identifying conventional and conversational implicature - Providing some interpretation of the targeted implicatures found in the first and second pages of the text | The strong do what they can, the weak bear what they have to bear." We must reject this doctrine. The UN is here to reject this doctrine | The world is under influence of some powerful countries |
|  |  |  | The use of violence will give birth to violence | The speaker invited all countries to unite against injustice |
| 10 | Fani Levia | - Underlining, and marking some implicatures found in the speech - Putting the translations in margin - Identifying conventional and conversational implicature |  |  |
| 11 | Halimah Sadiah (identying the implicature but doesnot explain the meaning) | - Underlining, and marking some implicatures found in the speech - Putting the translations in margin - Identifying conventional and conversational implicature |  |  |
| 12 | Balqis | - Underlining, and marking some implicatures found in the speech - Putting the translations in margin - Identifying conventional and conversational implicature |  |  |
| 13 | Maghfira (identying the implicature but doesnot explain the meaning) | - Underlining, and marking some implicatures found in the speech - Putting the translations in margin - Identifying conventional and conversational implicature |  |  |
| 14 | Rahma aulia | - Underlining, and marking some implicatures found in the speech - Putting the translations in margin - Identifying conventional and conversational implicature - Providing some interpretation some of the implicatures found | We believe in the United Nations, we will continue to serve where peace requires guards not only with words but with troops on the ground | Indonesia will support UN with all the risk |
|  |  |  | Our goal is clear: to eradicate all our citizens from Poverty and make Indonesia the centre of food, energy… | Indonesia is capable of being a strong, self- reliant, and globally influential |
|  |  |  | The president, your majesty, Our world is driven by conflict,… | The greetings are given to the leaders in the world. And at present the situation of the world is challenging |
| 15 | Aulia Maylani | - Underlining, and marking some implicatures found in the speech - Putting the translations in margin - Identifying conventional and conversational implicature - Providing some interpretation some of the implicatures found | We believe that in the next few years, Indonesia will become the world’s food barn | Indonesia has achieved remarkable success in global food supply, and people should recognize it as a significant power on the world stage. |
|  |  |  | We remain committed to internasionalism… | It means there is or are country countries who no longer commited to help UN |
|  |  |  | Our children are paying attention. They learn leadership not from textbooks, but from our choices | We have to choose a good leader |
| 16 | Agatha Kayla | - Underlining, and marking some implicatures found in the speech - Putting the translations in margin - Identifying conventional and conversational implicature - Providing some interpretation some of the implicatures found | Human carelessness, fuelled by fear, racism, hatred, oppression, and apartheid, threatens our common future | There are some countries who fuelled conflict and wars |
|  |  |  | …where peace, prosperity and progress are not the privilege of a handful of people, but the right of everyone…. | Currently, peace is enjoyed mostly by wealthy and powerful states |
|  |  |  | Violence breeds more violence | Critique of Israel military aggression and other major conlict |
|  |  |  | Two state solution | Indonesia takes a moderate, justice- driven anti-violence stance by supporting Palestine independence and Israeli security |
|  |  |  | Call for leaders to unite | Many world leaders behave in self-serving and unjust ways. |
|  |  |  | …Who will save them… | UN is slow.  UN can not make proper decision as it is blocked by big- power interest |

**Appendix 2. Observation Notes**

**Observation notes**

Date : November 20, 2025

**Context**: Students were assigned to identify implicature in a political speech of Prabowo Subianto and submit their interpretations of the text given personally

**1. Amanda Fires**

**Process** : Demonstrated engagement by circling and underlining several sentences in the text, and also included brackets to highlight the main topic

**Comments Made**: I don’t fully understand how conversational and conventional implicature goes beyond just its definition

**Challenges**: Struggled with distinguishing conversational from conventional implicature

**Interpretation**: Identified the implicatures but missed to recognize the meaning implied by them

**2. Salva**

**Process** : Demonstrated engagement by circling and underlining several sentences in the text, and also included brackets to highlight the main topic

**Comments Made**: I understand the theory of implicature but in practice, especially when examining the speech, it is more difficult to differentiate conventional from conversational implicature

**Challenges**: Struggled with distinguishing conversational from conventional implicature

**Interpretation**: Identified the implicatures but missed to recognize the meaning implied by them

**3. Keisha Zahra**

**Process** : Demonstrated engagement by circling and highlighting several sentences in the text, as well as adding arrows and explanations for the highlighted words.

**Comments Made**: my process of analyzing the speech text is first I quickly read the entire text to identify the main topic. Then identify the primary claims in each paragraph. I performed focused reading , specifically looking for words. After that I organized them and explained the relationship between what is said and what was meant.

**Challenges**: Struggled with identifying the primary claims in each paragraph

**Interpretation**: Focus on certain words to determine their meanings, but miss to identify the meanings implied by the implicature she recognized.

**4. Arul**

- **Process**: Seemed engaged, circling some phrases and translate the phrases.
- **Comments Made**: when I processed the text to identify the kinds of implicature, I have to know the context paragraph itself so I decided to translate first to know the meaning and could decide the meaning.
- **Challenges**: Struggled with comprehending the text and trying to figure out the context in each paragraph.
- **Interpretation**: Identified both conventional and conversational implicatures, translate the meaning of the target words to get the context in each paragraph but missed to find the implied meaning of implicature

**5. Ayu Dian**

- **Process**: Demonstrated engagement by highlighting and underlining several sentences and phrases in the text to identify the implicature , as well as adding explanations showing her understanding of the highlighted or underlined sentences or phrases.
- **Comments Made**: “Honestly, I am very confused about the task, I understand what conversational and conventional implicature but I am still confused about how to analyze them. How much more when I explained sentence by sentence ”
- **Challenges**: struggled with the text comprehension, and focused more on rhetorical strategies to find out the Prabowo’s appeal in delivering the speech
- **Interpretation**: she identified the rhetorical strategies of the speaker but missed to identify the meaning of implicature

**__________________________________________________________________________________**

**6. Adlin**

- **Process**: Demonstrated engagement by and underlining several sentences and phrases in the text to identify the implicature , as well as adding explanations showing the meaning of the implicature .
- **Comments Made**: “To be honest, I’m tired of working hard on this task and I am little confused to do the task. I realized that I need to read each sentence more carefully and understand the context”
- **Challenges**: struggled to identify both conventional and conversational implicature and distracted by the rhetorical strategies employed by Prabowo as the speaker
- **Interpretation**: At the beginning, He is able to provide meaning of the implicature he highlighted but at the end of the section, he identified the rhetorical strategies and missed to identify the meaning of the implicature.

**______________________________________________________________________________**

**7. Wanda A. Syarifa**

**Process** : Highlighting the implicatures, conjunction, and cohesive devices found in the speech, putting the translations in margin, and identifying conventional and conversational implicature

**Comments Made**: Even though we kinda understood what is conventional and conversational means, I still confused when I need to look for it in this text.

**Challenges**: Struggled to identify both conventional and conversational implicature in the text

**Interpretation**: the student put some colors to highlight the implicatures. And translate them in margin but missed to identify the meaning implied

**8. Shilvia Nuraini**

**Process**  Highligting some implicatures found in the speech, putting the translations in margin, identifying conventional and conversational implicature, providing some interpretation of the targeted implicatures found in the first and second pages of the text

**Comments Made**: While working on task of identifying conversational and conventional parts of the text, I realized that I needed to read each sentence more carefully and understand its context.

**Challenges**: it seemed that she was able to identify the implied meaning of some implicatures found in first and second pages though.

**Interpretation**: She did not identify implicature in every single paragraph in the text. She just focused on the word or phrases and tried to find the implied meaning.

___________________________________________________________________________

**9. Salma Putri S.D**

**Process** : Underlining, and marking some implicatures found in the speech, putting the translations in margin, identifying conventional and conversational implicature, providing some interpretation of the targeted implicatures found in the first and second pages of the text

**Comments Made**: After read it I just read it. But when I look deeper into the implied meaning it becomes more confusing.

**Challenges**: She Struggled to identify both conventional and conversational implicature in the text, but she was able to identify the implied meaning of some implicature

**Interpretation**: The student engaged with the text and was able to identify some implied meaning

___________________________________________________________________________

**10. Fani Levia**

**Process** : Underlining, and marking some implicatures found in the speech, putting the translations in margin, identifying conventional and conversational implicature

**Comments Made**: In analyzing this, I feel dizzy because in my opinion there are many conveentional word, and when I found the world conversational I can’t write the reason even through I understand the meaning at word.

**Challenges**: She Struggled to identify both conventional and conversational implicature in the text

**Interpretation**: The student engaged with the text and made some translatation but missed to identify the implied meaning

___________________________________________________________________________

**11. Halimah Sadiah**

**Process** : Engagement with the text can be seen from the underlines dan some words in the bracket

**Comments Made**: I feel that this is too difficult and too overwhelming for me to work on, and I don’t fully understand it. That is why I am doing it with the help of AI- chat GPT, because I am stressed and unsure whether some of the explanations, I wrote are even correct. For me this topic is really heavy.

But by working on this, I have started to understand the difference between implied meaning and literal meaning although it takes me me quite a while to think it each time

**Challenges**: she struggled to comprehend the text. She tried to interpreted the meaning by translating the sentences or phrases she did not really understand

**Interpretation**: She just tried to distinguish the implied meaning from the literal meaning by highlighting the words or phrases but missed to dig the meaning of the phrases or sentences She underlined.

**12. Balqis Clarisa**

**Comments Made**: While searching/ analysis the sentences, I feel so confused because some sentence feel clear erough but then actually that was a conventional setences. I feel struggling on the part explaining the context because I feel so confused on how to explain it right since I wrote sure that I have doing it right or no

**Challenges**: she found it difficult to differentiate conventional from conversational implicature

**Interpretation**:

She attempted to differentiate the implied meaning from the literal meaning by highlighting words or phrases, but she failed to explore the significance of the phrases or sentences she underlined.

__________________________________________________________________________________

**13. Maghfira**

**Process** : The engagement with the text is illustrated through the use of underlined sentences and brackets, which serve as borders to connect different topics. Additionally, arrows are employed to direct the reader to meaning of underlined sentences.

**Comments Made**: in completing the assignment, I initially translated the text into Indonesian using Google lens, then I circled the sentences that I though needed context. However, when I repeated this process, I realized that it wasn’t enough to read / understand it just once. I needed to read it multiple times to grasp the meaning of what I had read repeatedly ( and maybe, there are many sentences that I missed to identify) this task trully made me think and I feel exhausted and frustrated at the same time. It automatically forced me to scan the text. However, I have come to understand that a speech/ text is not just about guiding the audience on how to interpret the message. Critical analysis is trully necessary for this assignment. But it also has made me appreciate the complexity of language in real practice.

**Challenges**:

She found it difficult to distinguish between conventional and conversational implicature, as well as to identify words with implied meanings.

**Interpretation**:

She was busy identifying conventional and conversational implicature and understanding the text by providing comment on how Prabowo delivered the speech but she missed to find the meaning of the implicature.

**___________________________________________________________________________**

**14. Rahma Aulia**

**Process** : The engagement with the text is illustrated through the use of underlined sentences showing the implicature..

**Comments Made**.

While working on the task about identifying literal and implied meanings I Prabowo’s speech. I honestly felt quite overwhelmed. The language he used was complex. So at first I was confused and even a bist dizzy trying to figure out what trully meant behind the each line. However at the same timei was actually impressed by the way he delivered his message. His wordingwaspowerfull and carefully chosen which made the analysis challenging but also interesting. Overall the task pushed me to think deeper, even though it was mentally exhausted

**Challenges**:

She found it difficult to distinguish between literal and implied meaning.

**Interpretation**:

She was busy identifying literal and implied meaning but she missed to explain the reason why the particular words or sentence have literal or implied meaning

___________________________________________________________________________

**15. Aulia Maylani**

**Process** : The engagement with the text is illustrated through the use of underlined sentences showing the implicature..

**Comments Made**.

My reflection after identifying the differences between literal and implied meaning is that I have become more aware of how words can shift depending on the context. I realized that understanding a sentence literally is not always enough; the situation, tone, and intention behind the speaker strongly influence the implied meaning at the same time , the speech uses strong tone and emphasis which also affect how the message should be uinterpreted

**Challenges**:

She found it difficult to distinguish between literal and implied meaning.

**Interpretation**:

She was busy identifying literal and implied meaning but she missed to explain the reason why the particular words or sentence have literal or implied meaning

___________________________________________________________________________

**16. Citra Lisnawati**

**Process :** She engaged with the text by underlining, circling, and translating the implicatures in margin

**Comment Made:**

**Challenges :** She identified the implicatures and to find the meaning of implicature with the help of AI. She was able to write down the literal meaning and beyond meaning of the implicatures

**Interpretation :** It seemed that with the help of IA, she was able to identify a lot of implicatures and figure out the implied meaning

__________________________________________________________________________________
